# Supplementary material for: Synthesis, structure and electrochemistry of isomeric nickel(ii) complexes of a [9]ane fused cyclam macrotricycle: evidence for a stable trans-IV and a redox induced rearrangement in a trans-I conformation
Source: Royal Society of Chemistry journal article supplement (doi:10.1039/c0dt00550a), 2010-01-01
Supplement: c0dt00550a.pdf [file c0dt00550a.pdf]

# Synthesis, Structure and Electrochemistry of isomeric Nickel(II) Complexes of a [9]ane fused Cyclam Macrotricyclic. Evidence for a Stable *trans-IV* and a Redox Induced Rearrangement in a *trans-I* Conformations.

Alex McAuley,<sup>\*a</sup> S. Subramanian<sup>b</sup> and T. Barclay<sup>c</sup>

<sup>a</sup>P.O.Box 3065, Department of Chemistry, University of Victoria, Victoria BC Canada V8W 3P6. Fax: 250 721; Tel: 250 721 7164; E-mail: [amcauley@uvic.ca](mailto:amcauley@uvic.ca)

<sup>b</sup>2036, Main Mall, Department of Chemistry, University of British Columbia, Vancouver, BC Canada V6T 1Z1. Fax: 604 822 7147; Tel: 604 822 3678; E-mail: [smanian@shaw.ca](mailto:smanian@shaw.ca)

<sup>c</sup>Department of Chemistry, North Harris College, Houston, TX 77073 U.S.A

## Supplementary Information:

### Contents:

Table S1. Crystallographic Data.

Table S2. Important Bond Lengths (Å) and Angles (°).

Figure S3. Scan rate dependent cyclic voltammogram of *cis*-[Ni(*trans-I*, *syn-L3*)] cation.

**Table S1. Crystallographic Data**

|                                    |                                                                                                        |                                                                                                      |
|------------------------------------|--------------------------------------------------------------------------------------------------------|------------------------------------------------------------------------------------------------------|
| Molecular formula                  | cis-NiCl <sub>2</sub> S <sub>2</sub> O <sub>4</sub> N <sub>4</sub> C <sub>18</sub> H <sub>44</sub>     | trans-NiCl <sub>2</sub> S <sub>2</sub> O <sub>8</sub> N <sub>4</sub> C <sub>18</sub> H <sub>36</sub> |
| Structural formula                 | [Ni(C <sub>18</sub> H <sub>36</sub> N <sub>4</sub> S <sub>2</sub> )]Cl <sub>2</sub> ·4H <sub>2</sub> O | [Ni(C <sub>18</sub> H <sub>36</sub> N <sub>4</sub> S <sub>2</sub> )](ClO <sub>4</sub> ) <sub>2</sub> |
| Formula weight                     | 574.30                                                                                                 | 630.24                                                                                               |
| Crystal size, mm                   | 0.29 × 0.33 × 0.42                                                                                     | 0.17 × 0.21 × 0.45                                                                                   |
| Crystal color                      | dark lavender                                                                                          | pale pink                                                                                            |
| a, Å                               | 17.450(3)                                                                                              | 22.384(9)                                                                                            |
| b, Å                               | 12.188(2)                                                                                              | 10.118(2)                                                                                            |
| c, Å                               | 11.897(2)                                                                                              | 14.300(3)                                                                                            |
| V, Å <sup>3</sup>                  | 2530.2(8)                                                                                              | 2493.3(13)                                                                                           |
| Cell detn, refls                   | 488                                                                                                    | 225                                                                                                  |
| d(calcd), g cm <sup>-3</sup>       | 1.51                                                                                                   | 1.68                                                                                                 |
| Space group                        | Pna2 <sub>1</sub>                                                                                      | C <sub>2/c</sub>                                                                                     |
| Z                                  | 4                                                                                                      | 4                                                                                                    |
| F000                               | 1224                                                                                                   | 1320                                                                                                 |
| Linear abs coeff, mm <sup>-1</sup> | 1.17                                                                                                   | 1.21                                                                                                 |
| h,k,l ranges                       | -20, 20; -14, 8; -14, 14                                                                               | -26, 26; -7, 11; -16, 16                                                                             |
| Crystal decay, %                   | 0.35                                                                                                   | 0.19                                                                                                 |
| Absorption range                   | 0.86-1.00                                                                                              | 0.76-1.00                                                                                            |
| Reflections measured               | 12895                                                                                                  | 6350                                                                                                 |
| Unique reflections                 | 4440                                                                                                   | 2193                                                                                                 |
| R for merge                        | 0.027                                                                                                  | 0.026                                                                                                |
| Refls in refinement I>2.0σ(I)      | 3770                                                                                                   | 1713                                                                                                 |
| Parameters refined                 | 280                                                                                                    | 160                                                                                                  |
| R1, wR2                            | 0.032, 0.078                                                                                           | 0.051, 0.142                                                                                         |
| R1 for I>0.0σ(I)                   | 0.043                                                                                                  | 0.066                                                                                                |
| GOF                                | 1.01                                                                                                   | 1.07                                                                                                 |
| Final diff map, e Å <sup>-3</sup>  | -0.24, +0.35                                                                                           | -0.49, +0.86                                                                                         |

**Table S2. Important Bond Lengths (Å) and Angles (°).**

| <i>cis</i> -[Ni( <i>trans-I</i> , <i>syn-L3</i> )] <sup>2+</sup> |            | <i>trans</i> -[Ni( <i>trans-IV</i> , <i>anti-L3</i> )] <sup>2+</sup> |            |
|------------------------------------------------------------------|------------|----------------------------------------------------------------------|------------|
| Ni(1)-N(4)                                                       | 2.100(3)   | Ni(1)- N(2)                                                          | 2.124(4)   |
| Ni(1)-N(2)                                                       | 2.101(3)   | Ni(1)- N(2)                                                          | 2.124(4)   |
| Ni(1)-N(1)                                                       | 2.164(3)   | Ni(1)- N(1)                                                          | 2.127(4)   |
| Ni(1)-N(3)                                                       | 2.179(3)   | Ni(1)- N(1)                                                          | 2.127(4)   |
| Ni(1)-S(2)                                                       | 2.4265(11) | Ni(1)-S(1)                                                           | 2.5321(13) |
| Ni(1)-S(1)                                                       | 2.4512(11) | Ni(1)- S(1)                                                          | 2.5321(13) |
|                                                                  |            |                                                                      |            |
| N(4)-Ni(1)-N(2)                                                  | 177.20(13) | N(2)-Ni(1)-N(2)                                                      | 180.0(3)   |
| N(4)-Ni(1)-N(1)                                                  | 94.12(12)  | N(2)-Ni(1)-N(1)                                                      | 83.54(15)  |
| N(2)-Ni(1)-N(1)                                                  | 84.30(13)  | N(2)-Ni(1)-N(1)                                                      | 96.46(15)  |
| N(4)-Ni(1)-N(3)                                                  | 84.50(13)  | N(2)-Ni(1)-N(1)                                                      | 96.46(15)  |
| N(2)-Ni(1)-N(3)                                                  | 93.68(13)  | N(2)-Ni(1)-N(1)                                                      | 83.54(15)  |
| N(1)-Ni(1)-N(3)                                                  | 105.32(11) | N(1)-Ni(1)-N(1)                                                      | 180.0(2)   |
| N(4)-Ni(1)-S(2)                                                  | 83.29(9)   | N(2)-Ni(1)-S(1)                                                      | 98.60(11)  |
| N(2)-Ni(1)-S(2)                                                  | 98.64(9)   | N(2)-Ni(1)- S(1)                                                     | 81.40(11)  |
| N(1)-Ni(1)-S(2)                                                  | 170.43(9)  | N(1)-Ni(1)-S(1)                                                      | 98.88(11)  |
| N(3)-Ni(1)-S(2)                                                  | 83.66(8)   | N(1)-Ni(1)-S(1)                                                      | 81.12(11)  |
| N(4)-Ni(1)-S(1)                                                  | 98.73(9)   | N(2)-Ni(1)-S(1)                                                      | 81.40(11)  |
| N(2)-Ni(1)-S(1)                                                  | 83.42(10)  | N(2)-Ni(1)-S(1)                                                      | 98.60(11)  |
| N(1)-Ni(1)-S(1)                                                  | 83.60(9)   | N(1)-Ni(1)-S(1)                                                      | 81.12(11)  |
| N(3)-Ni(1)-S(1)                                                  | 170.35(8)  | N(1)-Ni(1)-S(1)                                                      | 98.88(11)  |
| S(2)-Ni(1)-S(1)                                                  | 87.67(4)   | S(1)-Ni(1)-S(1)                                                      | 180.00(5)  |

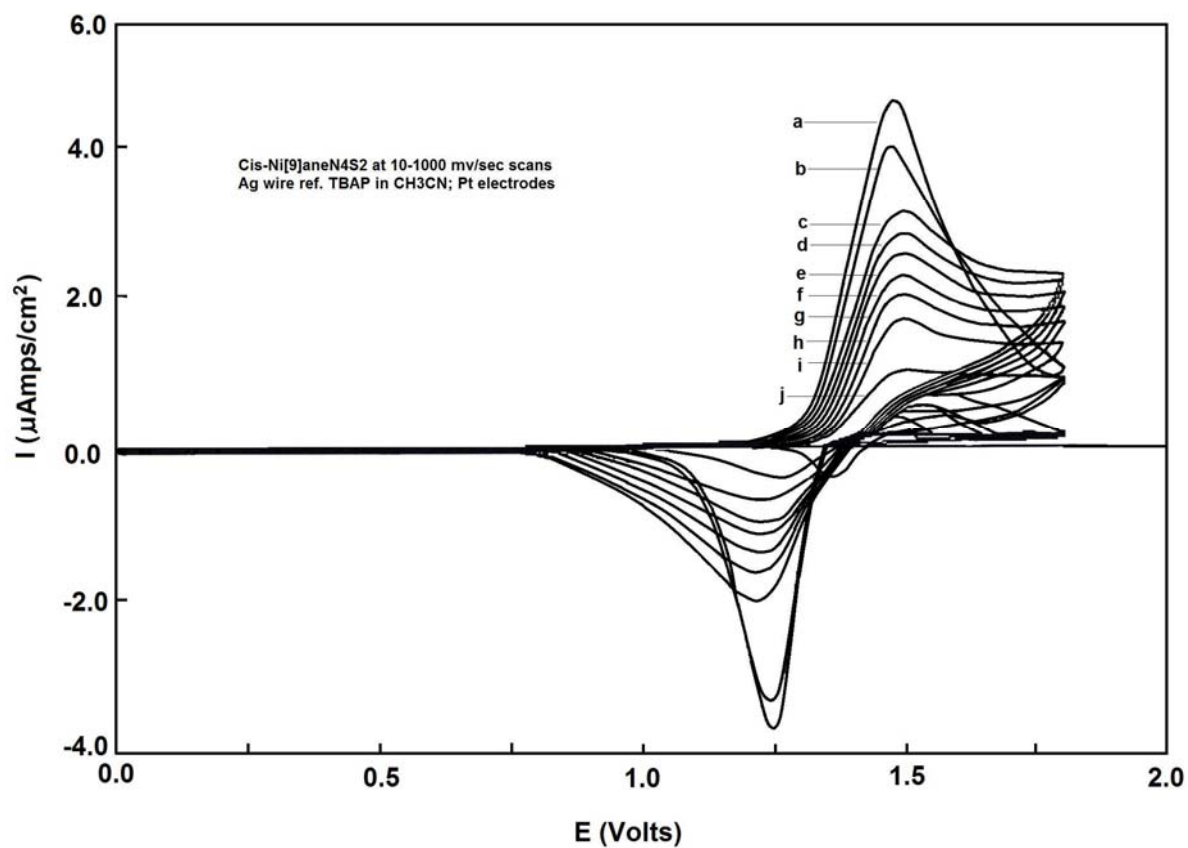

**Figure S3.** Scan rate dependent cyclic voltammogram of *cis*-[Ni(*trans*-1, *syn*-L3)] cation. Scan rates (mV/sec): a = 10; b = 25; c = 50; d = 100; e = 200; f = 300; g = 400; h = 500; i = 750 and j = 1000.
